# Supplementary material
Source: PubMed Central journal article supplement (PMC6709476)
Supplement: AAC.00207-19-s0001.pdf [file AAC.00207-19-s0001.pdf]

## Supplementary Information

**Supplementary Note 1. Homology model construction for *E. coli* DNA gyrase and topoisomerase IV.** As the X-ray crystal structures of the protein targets of *E. coli* are not available, we have built homology models of DNA gyrase and topoisomerase IV based on structural templates from *Staphylococcus aureus* and *K. pneumoniae*, respectively (see Materials and Methods). To construct homology models of *E. coli* DNA gyrase and topoisomerase IV, homologous bacterial protein sequences were downloaded from UniProt (<https://www.uniprot.org/>) (see also Methods). Sequence alignments were carried out using the Schrödinger Program Suite(1) with BLOSUM62 substitution matrix, with -10.0 as gap opening and -1.0 as gap extension penalty. **Supplementary Table S1** lists sequence identities and homologies of target-template sequence pairs used in our homology model construction.

| Target-template pairs     | Identity (%) | Homology (%) |
|---------------------------|--------------|--------------|
| <b>GyrA</b> P0AES4-P20831 | <b>50</b>    | <b>69</b>    |
| <b>GyrB</b> P0AES6-P0A0K8 | <b>44</b>    | <b>56</b>    |
| <b>ParC</b> P0AFI2-R4YE07 | <b>95</b>    | <b>97</b>    |
| <b>ParE</b> P20083-R4YHS8 | <b>94</b>    | <b>97</b>    |

**Supplementary Table S1.** Sequence identity and homology of target sequences GyrA(P0AES4), GyrB(P0AES6) chains of DNA gyrase and ParC(P0AFI2), ParE(P20083) chains of topoisomerase IV of *E. coli* K-12, compared to their template structures from *Staphylococcus aureus* (GyrA(P20831), GyrB(P0A0K8)) and *K. pneumoniae* (ParC(R4YE07), ParE(R4YHS8)), respectively.

**Supplementary Note 2. Two alternative binding poses of gepotidacin at *E. coli* DNA gyrase and topoisomerase IV.** The binding sites for gepotidacin at both DNA gyrase and topoisomerase IV are located at the interface of the GyrA and ParC subunits, respectively (Figure 1). These two subunits together form the mainly hydrophobic binding pocket of gepotidacin. Based on our model, only a single strong, non-hydrophobic interaction appears between gepotidacin and the target proteins, namely a salt-bridge formed by gepotidacin with D82 in the GyrA subunit of DNA gyrase and D79 in the ParC subunit of topoisomerase IV. However, due to the symmetry of this binding cavity at both subunits (GyrA and ParC), the reconstructed binding modes contained two alternative binding poses (see Supplementary Figure S1). Both of these binding poses show an approximately 2-fold rotational symmetry in their orientation, and this way the triazaacenaphthylene ring intercalates DNA in a 180 degree-rotated orientation compared to each other. The protonated secondary nitrogen of gepotidacin also changes its dominant interaction with D82 of GyrA and D79 of ParC from one chain to the other, respectively, on both targets. The pyranopyridine ring is also turned around, but it occupies the same hydrophobic pocket. Because of the symmetrical arrangement of the two binding modes, only one of them was used in our further analyses. As a confirmation for these binding modes, the molecular dynamics simulations also proved that the initial binding positions of gepotidacin in wild-type proteins are stable: the average root mean square deviations (RMSD) of heavy atom coordinates of gepotidacin during the second half of the simulation from the initial pose was  $1.24 \pm 0.27 \text{ \AA}$  for the wild-type DNA gyrase, and  $1.10 \pm 0.14 \text{ \AA}$  for the wild-type topoisomerase IV. This means that the initial positions were somewhat changed during the simulation, but the systems could reach equilibrium positions close to the initial one with small average fluctuations.

**Supplementary Figure S1. Intermolecular interactions between gepotidacin and its binding-site forming amino acids at DNA gyrase (A) and topoisomerase IV (B).** Green lines indicate drug-target interactions with DNA nucleobases; purple line indicates salt bridge between gepotidacin and GyrA D82 (A), and ParC D79 residues (B) respectively. Results are based on 100 nanosecond long molecular dynamics simulations of gepotidacin-bound *E. coli* DNA gyrase and topoisomerase IV complexes. Figure displays binding-site forming amino acids and DNA nucleobases (in grey) that are closer than 4Å to gepotidacin at DNA gyrase and topoisomerase IV. D82N (GyrA) and D79N (ParC) mutations leave this interaction pattern unchanged but increase the binding free energies in both cases as it is indicated by the  $\Delta\Delta G_B$  values (obtained from MM-GBSA calculations) in panel A and B, respectively.

**A**

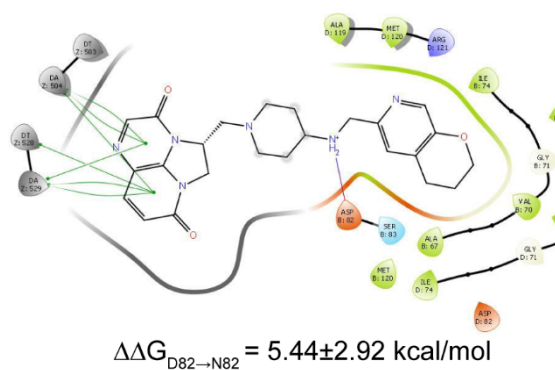

**B**

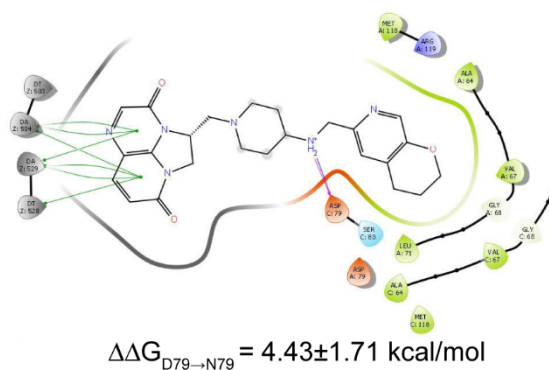

**Supplementary Figure S2. Two alternative binding poses of gepotidacin in the homology model of *E. coli* K-12 DNA gyrase.** Gepotidacin appears in ball-and-stick representation, the DNA chain is shown as thin sticks, the two GyrA chains (B and D) are in ribbon representation, and D82 residues of GyrA are represented as balls, while S83 and R119 appear as sticks.

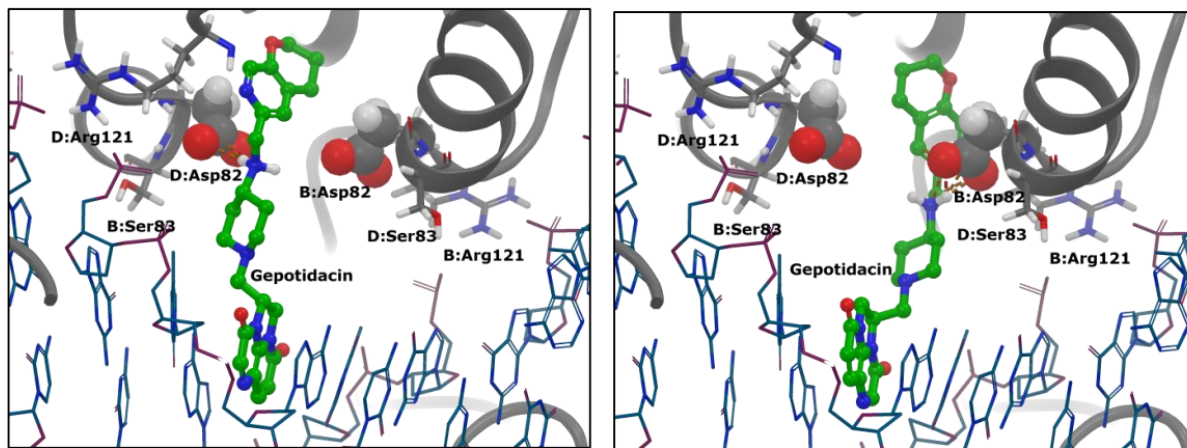

**Supplementary Table S2. The studied mutations are prevalent in bacterial populations never treated with gepotidacin.** Literature data referring to mutations associated with reduced susceptibility to gepotidacin and their prevalence in human clinical pathogens. Amino acid positions are marked according to their corresponding residue in *Escherichia coli* K-12 MG1655. N.a denotes observed mutation (prevalence = single case) with no available prevalence, *mut* denotes any mutation at a given position. Screening of the publicly available nucleotide archive of the National Center for Biotechnology Information (NCBI) shows an abundance of the aforementioned mutations in other sequencing data as well, in multiple human-associated bacterial species.

| Species                                            | Detected mutations  | Prevalence (%)/ Strain number | Source                                           |
|----------------------------------------------------|---------------------|-------------------------------|--------------------------------------------------|
| <i>Salmonella enterica</i>                         | GyrA D82N           | 2.9–10%                       | Eaves, D. J. et al. 2004.(2)                     |
| <i>Neisseria gonorrhoeae</i>                       | ParC D79N           | 54%                           | Su, X. et al. 2001.(3)                           |
| <i>Neisseria gonorrhoeae</i>                       | ParC D79N           | 16.90%                        | Jacobsson, S. et. al. 2018.(4) + Homology search |
| <i>Salmonella enterica</i> serovar Typhimurium     | GyrA D82 <i>mut</i> | 100%                          | Thong, K. L. et al. 2015.(5)                     |
| <i>Mycoplasma genitalium</i>                       | ParC D79N           | 1.60%                         | Hamasuna, R. et al. 2018.(6)                     |
| <i>Salmonella enterica</i> serovar Typhimurium     | GyrA D82N           | n.a.                          | Randall, L. P. et. al. 2005.(7)                  |
| <i>Salmonella enterica</i> serovar Typhi           | GyrA D82N           | n.a.                          | García-Fernández, A. et al. 2015.(8)             |
| <i>Bifidobacterium breve</i>                       | GyrA D82N           | 8                             | Homology search from NCBI database               |
| <i>Mycoplasma bovis</i>                            | GyrA D82N           | 2                             | Homology search from NCBI database               |
| <i>Clostridium difficile</i>                       | GyrA D82N           | 2                             | Homology search from NCBI database               |
| <i>Cutibacterium acnes</i>                         | GyrA D82N           | 1                             | Homology search from NCBI database               |
| <i>Salmonella enterica</i> serovar <i>Infantis</i> | GyrA D82N           | 1                             | Homology search from NCBI database               |
| <i>Mycobacterium malmøense</i>                     | GyrA D82N           | 1                             | Homology search from NCBI database               |
| <i>Citrobacter sp.</i>                             | ParC D79N           | 1                             | Homology search from NCBI database               |
| <i>Streptococcus pneumoniae</i>                    | ParC D79N           | 1                             | Homology search from NCBI database               |

|                              |           |    |                                    |
|------------------------------|-----------|----|------------------------------------|
| <i>Neisseria gonorrhoeae</i> | ParC D79N | 13 | Homology search from NCBI database |
|------------------------------|-----------|----|------------------------------------|

**Supplementary Figure S3. tBLASTn analysis identified genotypes associated with reduced susceptibility to gepotidacin in the nucleotide archive of the National Center for Biotechnology Information (NCBI). See Supplementary File 1 for taxon identifiers, GeneBank IDs, and analyzed protein sequences.**

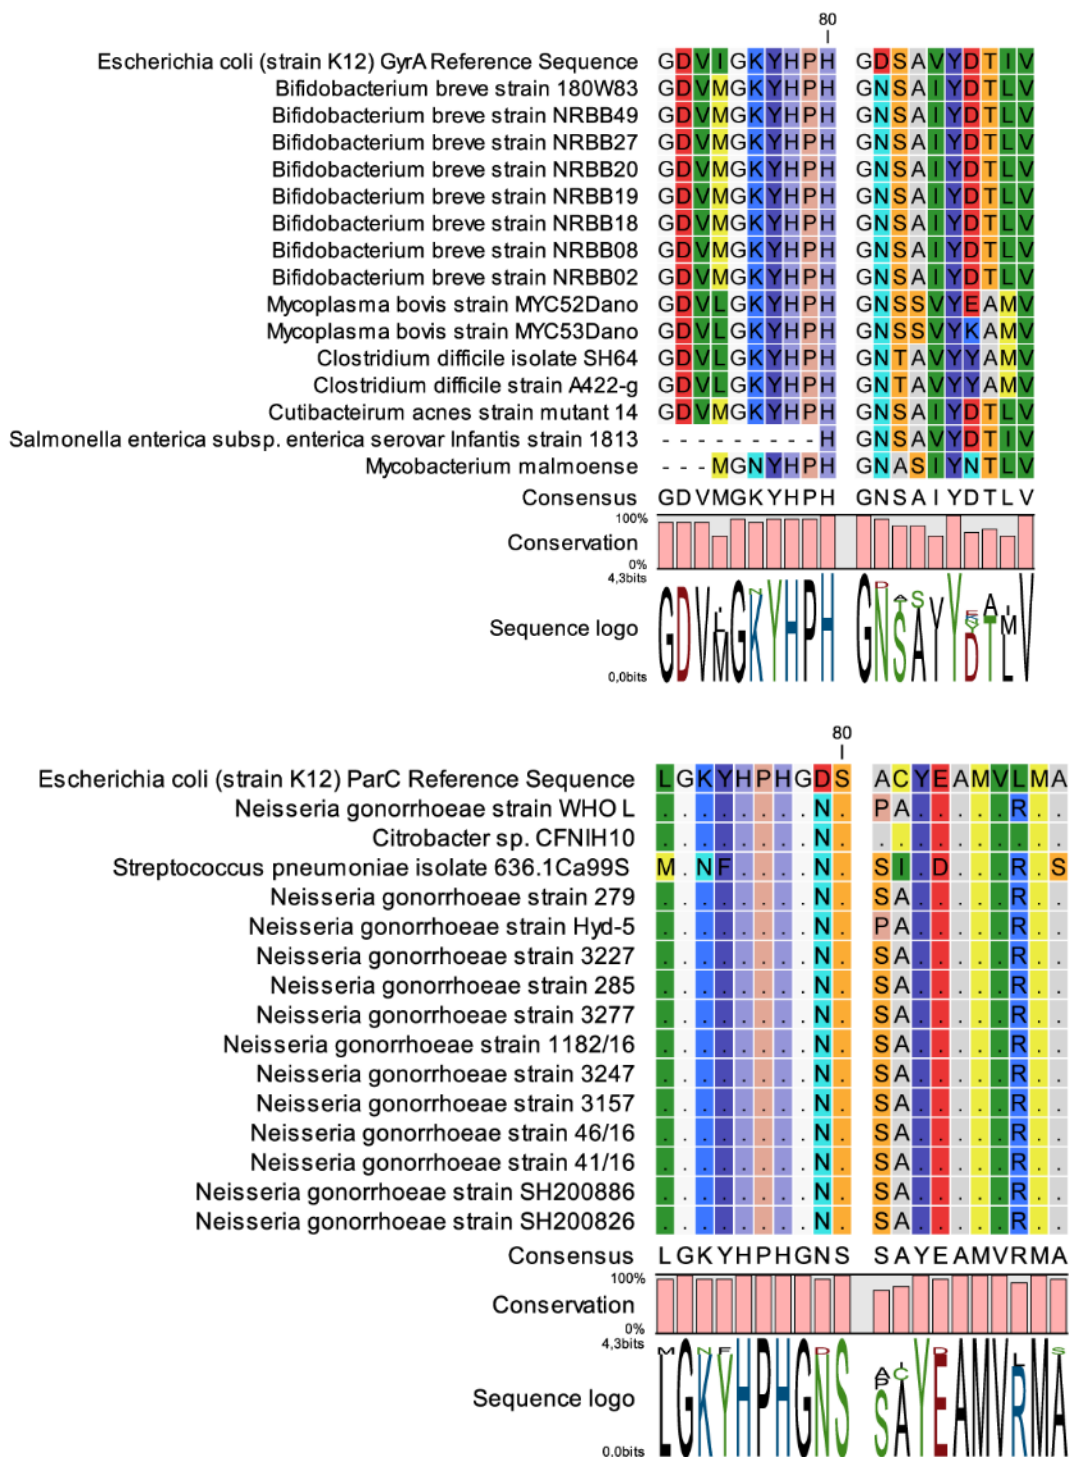

**Supplementary Table S3. Whole genome sequence analysis of laboratory-adapted, ciprofloxacin-resistance conferring variants of *Klebsiella pneumoniae* ATCC 10031 and *Escherichia coli* K-12 MG1655.**

| Linage                                         | Genomic position | Type | Reference  | Allele | Gene  | Amino acid change |
|------------------------------------------------|------------------|------|------------|--------|-------|-------------------|
| <b><i>Klebsiella pneumoniae</i> ATCC 10031</b> |                  |      |            |        |       |                   |
| <b>E2</b>                                      | 1177644          | SNV  | T          | G      | gyrA  | Y548D             |
|                                                | 3454728          | DEL  | CAT        | C      | bm3R1 | Frameshift        |
|                                                | 5009863          | SNV  | T          | C      | rpoB  | D675G             |
| <b>E4</b>                                      | 811416           | SNV  | T          | G      | cusS  | S260A             |
|                                                | 1177644          | SNV  | T          | G      | gyrA  | Y548D             |
|                                                | 3454728          | DEL  | CAT        | C      | bm3R1 | Frameshift        |
|                                                | 5009863          | SNV  | T          | C      | rpoB  | D675G             |
| <b>E6</b>                                      | 811416           | SNV  | T          | G      | cusS  | S260A             |
|                                                | 811421           | SNV  | C          | T      | cusS  | N261N             |
|                                                | 811427           | SNV  | C          | T      | cusS  | S263S             |
|                                                | 1176261          | SNV  | G          | T      | gyrA  | D87Y              |
|                                                | 1177644          | SNV  | T          | G      | gyrA  | Y548D             |
|                                                | 3454728          | DEL  | CAT        | C      | bm3R1 | Frameshift        |
|                                                | 5009863          | SNV  | T          | C      | rpoB  | D675G             |
| <b><i>Escherichia coli</i> K-12 MG1655</b>     |                  |      |            |        |       |                   |
| <b>E8</b>                                      | 485845           | INS  | G          | GTA    | acrR  | Frameshift        |
|                                                | 2339176          | INS  | T          | TCAC   | gyrA  | Frameshift        |
|                                                | 3878726          | SNV  | T          | G      | gyrB  | Q465P             |
|                                                | 4114421          | SNV  | C          | A      | fpr   | A18S              |
|                                                | 4182842          | DEL  | TCGGCCCAGG | T      | rpoB  | Frameshift        |
|                                                | 4277526          | SNV  | C          | A      | soxR  | R20S              |
|                                                | 485845           | INS  | G          | GTA    | acrR  | Frameshift        |
| <b>E10</b>                                     | 485934           | SNV  | G          | T      | acrR  | L58F              |
|                                                | 924967           | INS  | A          | AG     | clpA  | Frameshift        |
|                                                | 1342333          | SNV  | T          | A      | pyrF  | L138Q             |
|                                                | 1619348          | SNV  | C          | T      | marR  | R77C              |
|                                                | 1910623          | SNV  | C          | T      | yebQ  | F116F             |
|                                                | 2339162          | SNV  | C          | T      | gyrA  | D87N              |
|                                                | 2631101          | SNV  | C          | A      | guaA  | D479Y             |
|                                                | 3377148          | INS  | A          | AACAGG | sspA  | Frameshift        |
|                                                | 3554605          | DEL  | ACTGG      | A      | malT  | Frameshift        |
|                                                | 4184974          | SNV  | C          | A      | rpoB  | H1244N            |
|                                                | 4634724          | INS  | A          | ACCT   | rob   | Frameshift        |



**Supplementary Table S4. Sequence analysis of DivERGE-generated mutants of *Klebsiella pneumoniae* ATCC 10031 conferring reduced susceptibility to gepotidacin. Clones were selected at the peak plasma concentration of gepotidacin (9 µg/ml).**

| <b>Library</b>                                                              | <b>Clone ID</b> | <b>Mutation at GyrA</b> | <b>Mutation at ParC</b> |
|-----------------------------------------------------------------------------|-----------------|-------------------------|-------------------------|
| <b>DivERGE mutagenesis of <i>K. pneumoniae</i> GyrA and ParC</b>            | #1              | D82N                    | D79N                    |
|                                                                             | #2              | D82N                    | D79N                    |
|                                                                             | #3              | D82N                    | D79N                    |
|                                                                             | #4              | D82N                    | D79N                    |
|                                                                             | #5              | D82N                    | D79N                    |
|                                                                             | #6              | D82N                    | D79N                    |
|                                                                             | #7              | D82N                    | D79N                    |
|                                                                             | #8              | D82N                    | D79N                    |
|                                                                             | #9              | D82N                    | D79N                    |
|                                                                             | #10             | D82N                    | D79N                    |
| <b>Saturation mutagenesis of <i>K. pneumoniae</i> GyrA D82 and ParC D79</b> | #1              | D82N                    | D79N                    |
|                                                                             | #2              | D82N                    | D79N                    |
|                                                                             | #3              | D82N                    | D79N                    |
|                                                                             | #4              | D82N                    | D79N                    |
|                                                                             | #5              | D82N                    | D79N                    |
|                                                                             | #6              | D82N                    | D79N                    |
|                                                                             | #7              | D82N                    | D79N                    |
|                                                                             | #8              | D82N                    | D79N                    |
|                                                                             | #9              | D82N                    | D79N                    |
|                                                                             | #10             | D82N                    | D79N                    |

**Supplementary Table S5. Gepotidacin and ciprofloxacin minimal inhibitory concentration of single-step mutations and their combination in *Escherichia coli* K-12 MG1655 and *Klebsiella pneumoniae* ATCC 10031.** Growth inhibition was determined by optical density (OD<sub>600</sub>) measurements of the bacterial culture after 18 h incubation in the presence of the corresponding drug concentration, according to the EUCAST guidelines(9). Results presented here as the mean of 9 independent replicates respectively.

| <b>Mutant genotype</b>                                                           | <b>Ciprofloxacin<br/>MIC (µg/ml)</b> | <b>Gepotidacin<br/>MIC (µg/ml)</b> |
|----------------------------------------------------------------------------------|--------------------------------------|------------------------------------|
| <i>E. coli</i> K-12 MG1655 wild-type                                             | 0.016                                | 0.25                               |
| <i>E. coli</i> K-12 MG1655 GyrA S83L                                             | 0.063                                | 0.125                              |
| <i>E. coli</i> K-12 MG1655 GyrA S83L, D87N                                       | 0.25                                 | 0.25                               |
| <i>E. coli</i> K-12 MG1655 GyrA S83L, D87N; ParC S80I                            | 20                                   | 0.125                              |
| <i>E. coli</i> K-12 MG1655 GyrA S83L, D87Y; ParC S80I, E84G                      | 32                                   | 0.125                              |
| <i>K. pneumoniae ssp. pneumoniae</i> ATCC 10031 wild-type                        | 0.004                                | 0.063                              |
| <i>K. pneumoniae ssp. pneumoniae</i> ATCC 10031 GyrA S83F                        | 0.08                                 | 0.5                                |
| <i>K. pneumoniae ssp. pneumoniae</i> ATCC 10031 GyrA S83F, D87G                  | 0.125                                | 0.25                               |
| <i>K. pneumoniae ssp. pneumoniae</i> ATCC 10031 GyrA S83F, D87G; ParC S80I       | 2                                    | 0.063                              |
| <i>K. pneumoniae ssp. pneumoniae</i> ATCC 10031 GyrA S83F, D87G; ParC S80I, E84G | 4                                    | 0.31                               |

## References

1. 2017. Small-Molecule Drug Discovery Suite 2017-4. Schrödinger, LLC, New York, NY.
2. Eaves DJ, Randall L, Gray DT, Buckley A, Woodward MJ, White AP, Piddock LJV. 2004. Prevalence of Mutations within the Quinolone Resistance-Determining Region of *gyrA*, *gyrB*, *parC*, and *parE* and Association with Antibiotic Resistance in Quinolone-Resistant *Salmonella enterica*. *Antimicrob Agents Chemother* 48:4012–4015.
3. Su X, Lind I. 2001. Molecular Basis of High-Level Ciprofloxacin Resistance in *Neisseria gonorrhoeae* Strains Isolated in Denmark from 1995 to 1998. *Antimicrob Agents Chemother* 45:117–123.
4. Jacobsson S, Golparian D, Scangarella-Oman N, Unemo M. In vitro activity of the novel triazaacenaphthylene gepotidacin (GSK2140944) against MDR *Neisseria gonorrhoeae*. *J Antimicrob Chemother*. 2018, 73.8: 2072-2077.
5. Thong KL, Ngoi ST, Chai LC, Teh CSJ. 2015. Quinolone Resistance Mechanisms Among *Salmonella enterica* in Malaysia. *Microb Drug Resist* 22:259–272.
6. Hamasuna, R., Le, P. T., Kutsuna, S., Furubayashi, K., Matsumoto, M., Ohmagari, N., ... & Jensen, J. S. (2018). Mutations in *ParC* and *GyrA* of moxifloxacin-resistant and susceptible *Mycoplasma genitalium* strains. *PloS one*, 13(6), e0198355.
7. Randall LP, Coldham NG, Woodward MJ. 2005. Detection of mutations in *Salmonella entericagyrA*, *gyrB*, *parC* and *parE* genes by denaturing high performance liquid chromatography (DHPLC) using standard HPLC instrumentation. *J Antimicrob Chemother* 56:619–623.
8. García-Fernández A, Gallina S, Owczarek S, Dionisi AM, Benedetti I, Decastelli L, Luzzi I. 2015. Emergence of Ciprofloxacin-Resistant *Salmonella enterica* Serovar Typhi in Italy. *PLOS ONE* 10:e0132065.
9. ISO 20776-1:2006 - Clinical laboratory testing and in vitro diagnostic test systems -- Susceptibility testing of infectious agents and evaluation of performance of antimicrobial susceptibility test devices -- Part 1: Reference method for testing the in vitro activity of

antimicrobial agents against rapidly growing aerobic bacteria involved in infectious diseases.

ISO.
